# Supplementary material for: Hard to Reach and Hidden: Improving Identification of Young Dementia Carers
Source: Preprints.org preprint supplement (doi:10.20944/preprints202310.1565.v1), 2023-10-25

# Aim

1. Give you the chance to 'check' preliminary themes
2. Discuss pathways to increase the visibility (and identify) young dementia carers
3. Think about 'next steps'

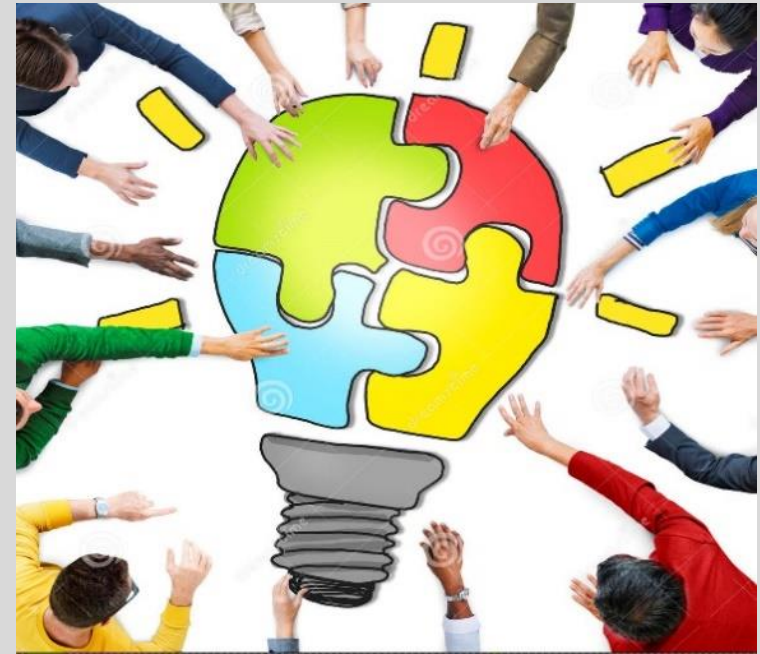

# Did I get it right?

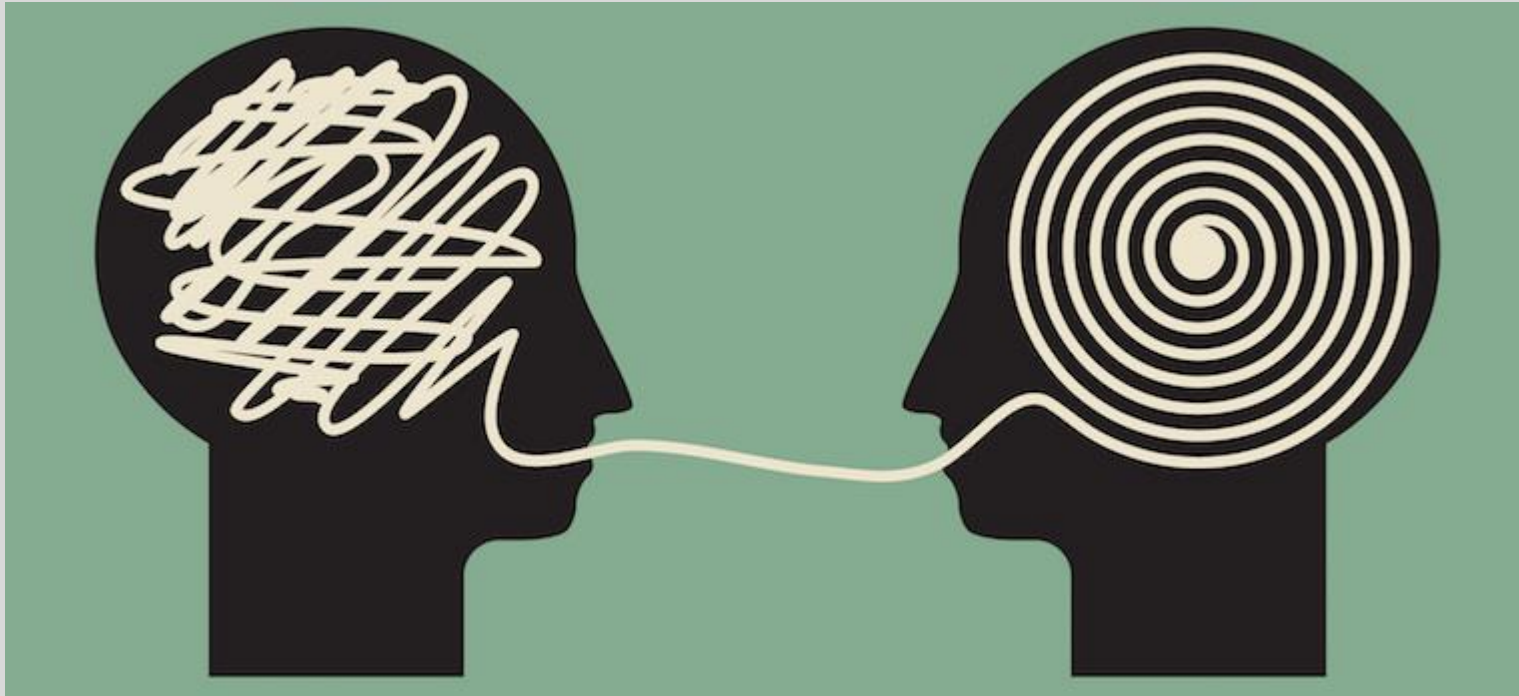

Theme 1:

**It needs to be a 'whole family approach'**

Theme 2:

**Nothing fancy – A chat is sometimes all it's needed**

Theme 3:

**No voice / No presence**

Theme 4:

**Postcode/School lottery**

Theme 5:

**Need to 'link' with adult campaigns/initiatives**  
(Unite forces)

Theme 6:

**It feels like nothing changes**

Theme 7:

**I am not a carer. This is my 'normal'**

# Identification/Communication

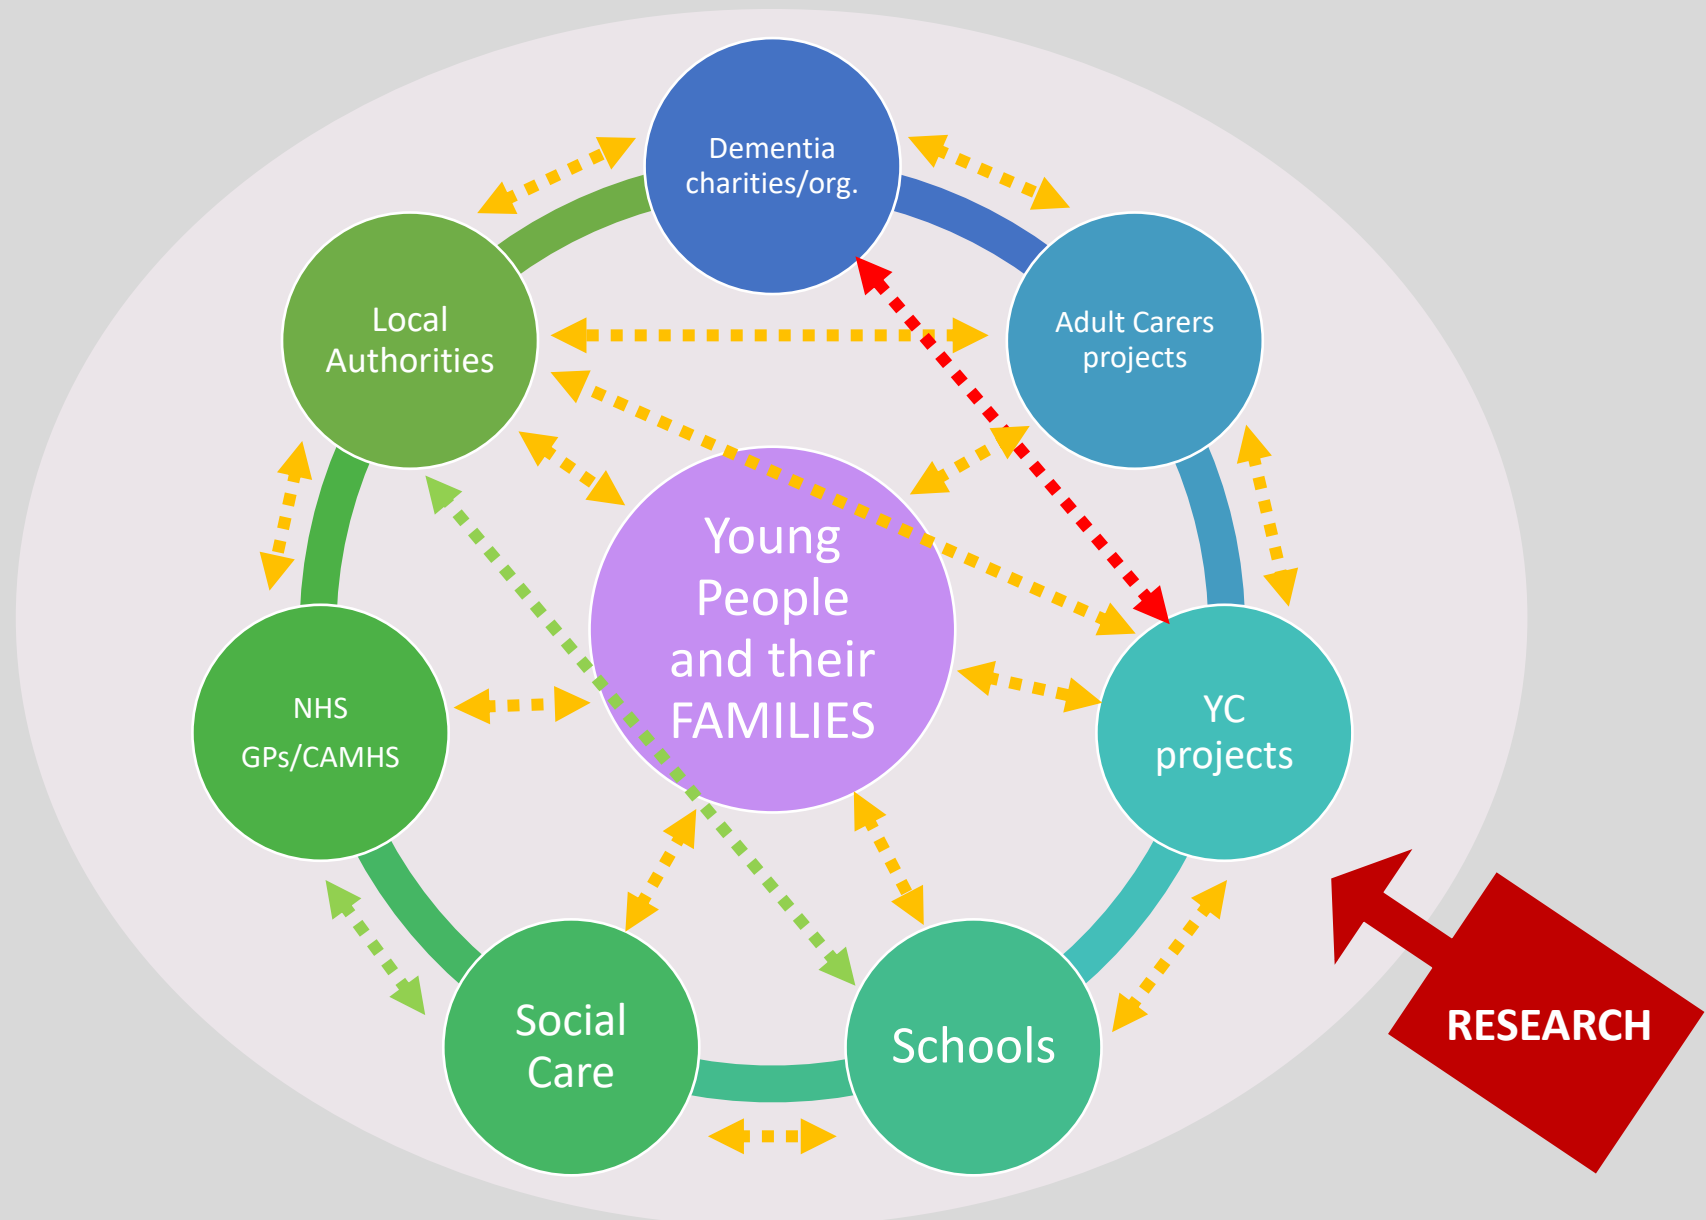

# Identification/Communication

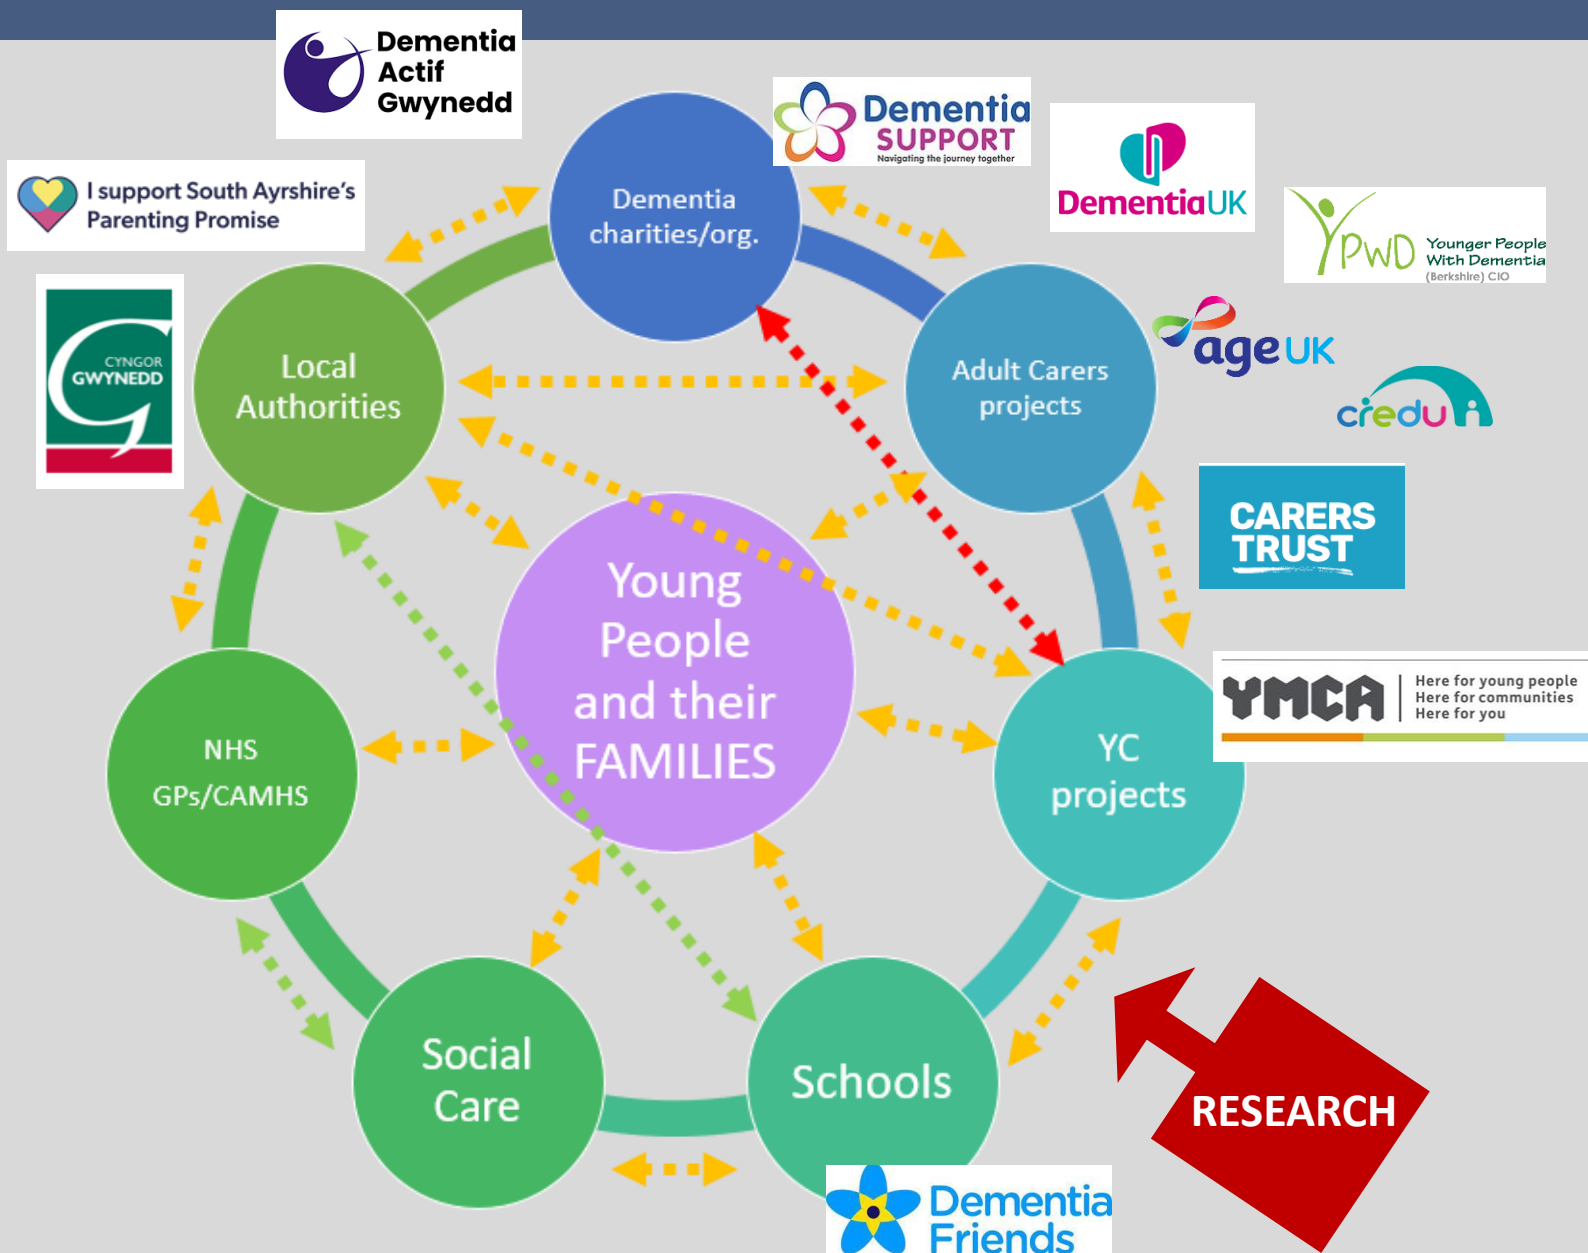

- How can these communication pathways improve?
- What can you/your organization do?

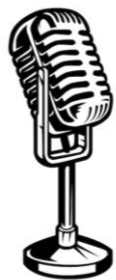

# Increasing VISIBILITY

- Online Network (e.g. similar model as Lorenzo's House) – including peer support
- Creation of small clips/resources that can be embedded in current 'information and awareness' sessions
- **Podcast** led by young people

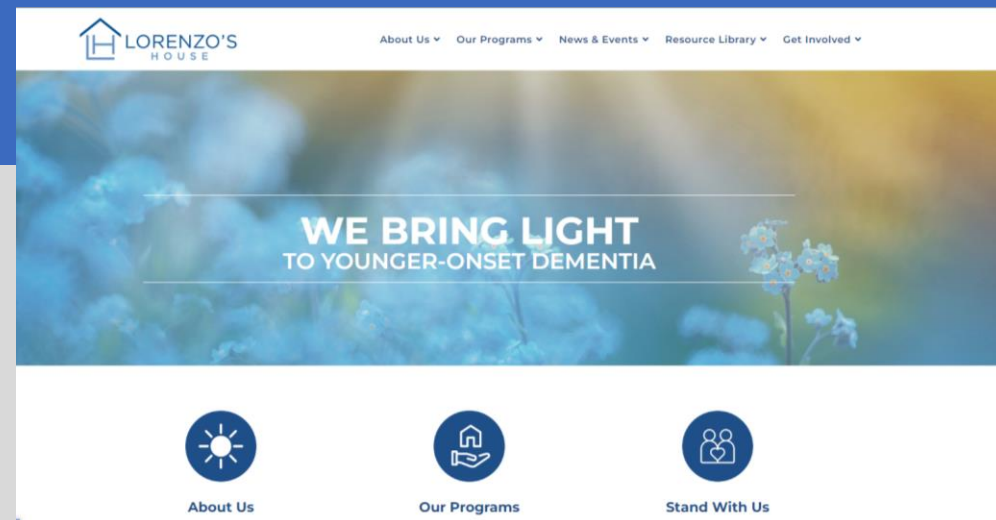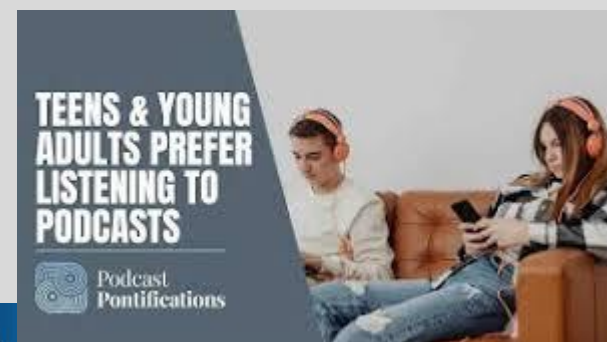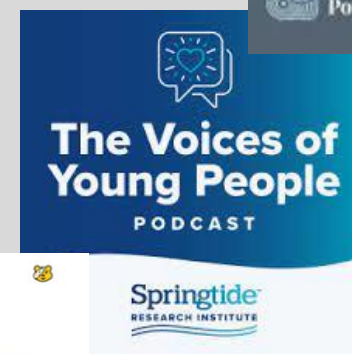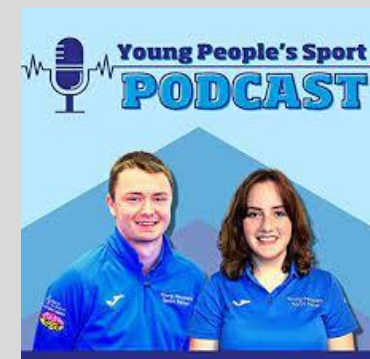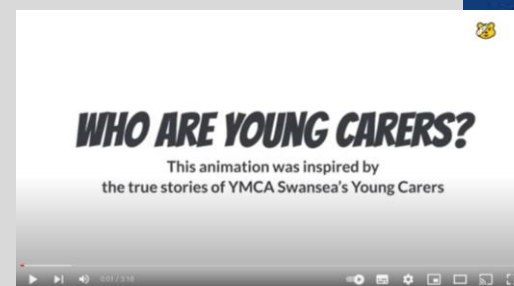



# Tailored support – at the right time

Dementia UK Shop Job vacancies How we can support you Latest news Contact us

Dementia Helpline: **0800 888 6678**

Search our site

About dementia  Get involved For professionals About us

You are here: [Home](#) / [Get support](#) / What is an Admiral Nurse?



**What is an Admiral Nurse and how can they help?**

Admiral Nurses are specialist dementia nurses. Continually supported and developed by Dementia UK, they provide life-changing support for families affected by all forms of dementia – including Alzheimer's disease.

We are

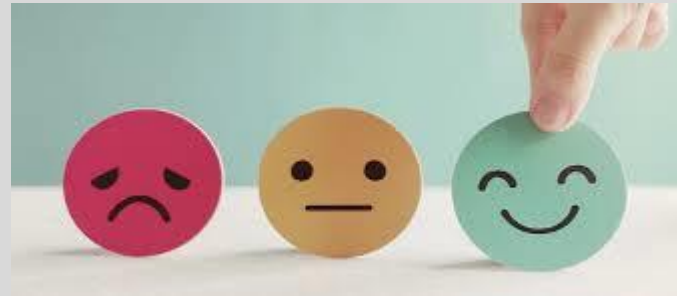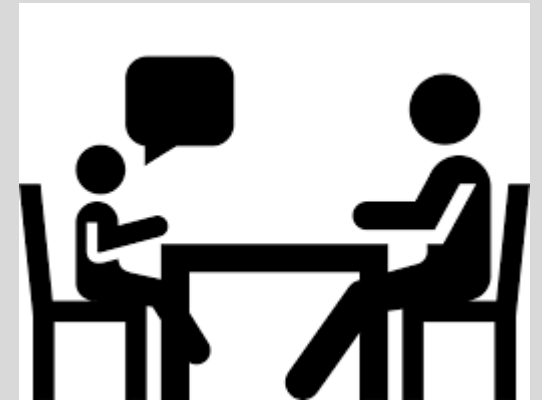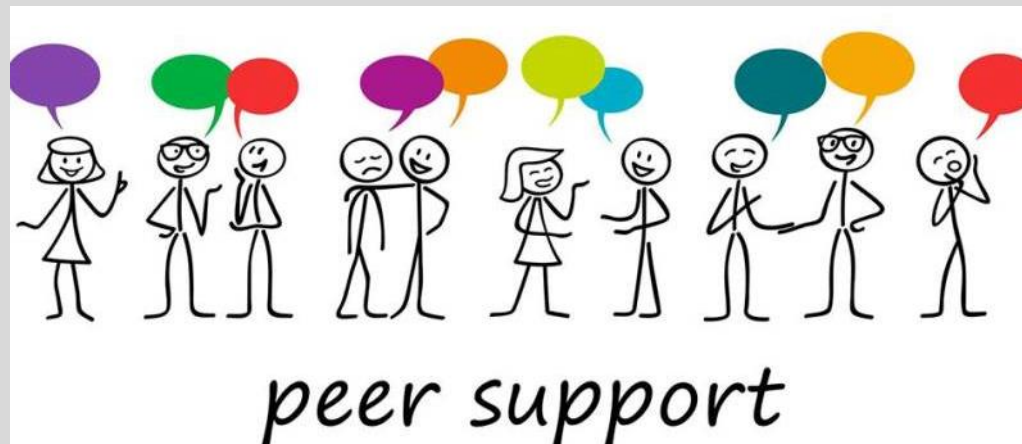

**iSupport**  
**For Young Carers**

Training and support manual for young carers of people with dementia



# What next?

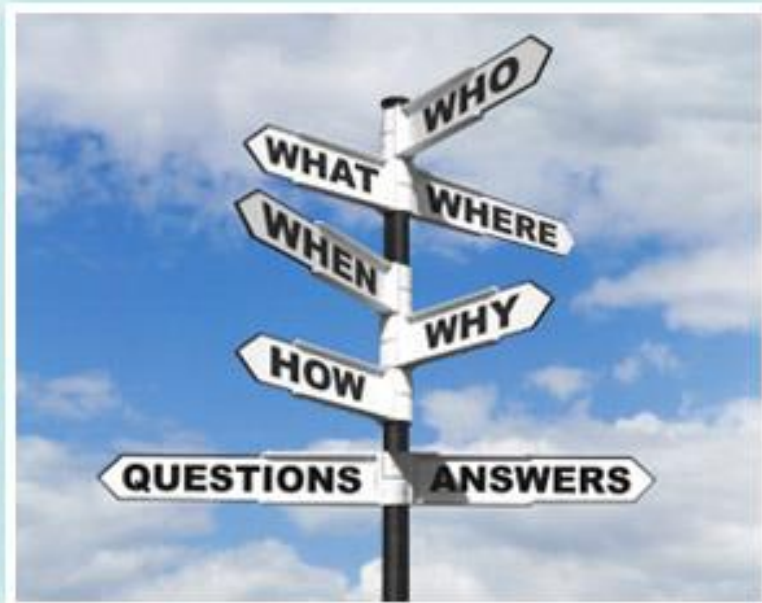

Supplement: Supplementary file 1 [file supplementary]
