# Supplementary material for: Hard to Reach and Hidden: Improving Identification of Young Dementia Carers
Source: Preprints.org preprint supplement (doi:10.20944/preprints202310.1565.v1), 2023-10-25
Supplement: Supplementary file 3 [file supplementary]

Archive with 2 entries (2 files):
- Supplementary File 1_Masterson-Algar et al.pdf
- Supplementary File 2_Masterson-Algar et al. 2023.pdf
